# Supplementary material for: Crystal reconstruction of binary oxide hexagonal nanoplates: monocrystalline formation mechanism and high rate lithium-ion battery applications
Source: Royal Society of Chemistry journal article supplement (doi:10.1039/c9nr10032f), 2020-01-01
Supplement: c9nr10032f1.pdf [file c9nr10032f1.pdf]

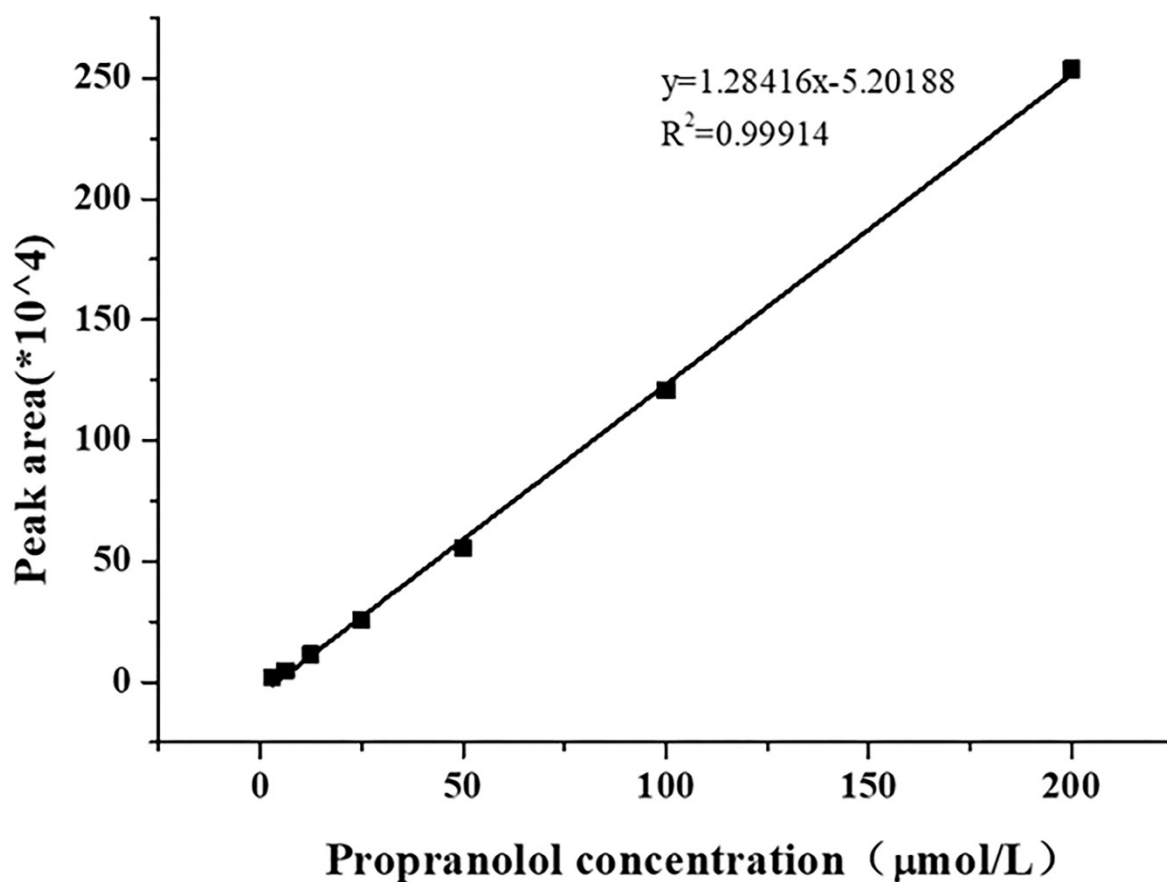

**Figure A.** Propranolol standard curve of HPLC (225 nm), in which the concentration of propranolol (μM) is the abscissa and the peak area is the ordinate. The curve has a good linearity in the concentration range of 3.125 μM–200.00 μM, and the regression equation is:  $y = 1.28416x - 5.20188$ ,  $r^2 = 0.99914$ .

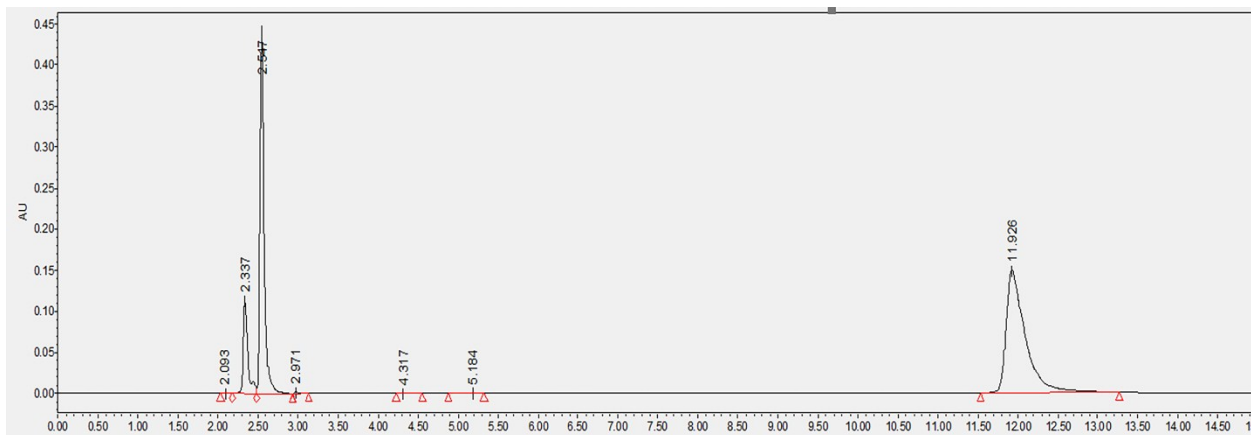

**Figure B.** High performance liquid chromatogram (HPLC) of propranolol with a retention time of about 11.926 min, and the average Papp value of propranolol determined by HPLC was  $13.69 \times 10^{-6}$  cm/s.
